# Supplementary material for: Generation of a novel, multi-stage, progressive, and transplantable model of plasma cell neoplasms
Source: PubMed Central journal article supplement (PMC4785351; doi:10.1038/srep22760), 2016-03-10
Supplement: srep22760-s1.pdf [file srep22760-s1.pdf]

## **Supplementary Information**

### **Generation of a novel, multi-stage, progressive, and transplantable model of plasma cell neoplasms**

Takashi Asai, Megan A. Hatlen, Chen Lossos, Delphine Ndiaye-Lobry, Anthony Deblasio, Kazunori Murata, Martin Fleisher, Elena M Cortizas, Ramiro E Verdun, John Petrini, Stephen D Nimer

## Supplementary Methods

### Southern Blot analysis of V(D)J rearrangement

DNA from wild-type splenic B-cells as well as tumor cells was isolated with proteinase K treatment followed by phenol extraction and ethanol precipitation. Purified DNA was digested with EcoRI and analyzed by Southern blot with a <sup>32</sup>P-labeled J<sub>H</sub>4-E<sub>μ</sub> probe as described previously (Ref 1). The primer sets used for the 1858bp J<sub>H</sub>4-E<sub>μ</sub> probe are: J4-E<sub>μ</sub> FW 5'-CCTCAGCTCCCATACTTCATGGCCA3'; and J4-Emu RV 5'-CTCAGCCTGGACTTTCGGTT-3'.

### Quantitative PCR

Quantitative PCR was performed by 7500 Fast Real-Time PCR System (Applied Biosystems), using RNA isolated from wild type plasma cells, which were sorted by mouse CD138+ Plasma Cell Isolation Kit (Miltenyi Biotec), and plasma cell tumors derived from *Mef<sup>f/-</sup> Rad50<sup>s/s</sup>* mice. Transcript expression levels were calculated and standardized by the ratio of each transcript vs Hprt. The following Taqman probes (Life Technologies) were used for quantitative PCR: Mm00432050\_m1 (Bax),

Mm02528810\_s1 (Bcl), Mm00432359\_M1 (Ccnd1), Mm01612362\_m1 (Ccnd3),  
Mm00446968\_m1 (Hprt), Mm00516431\_m1 (Irf4), Mm00487804\_m1 (Myc),  
Mm00446968\_m1 (Prdm1), and Mm00457357\_m1 (Xbp-1).

### **Measurement of micro-vessel densities**

Micro-vessel densities were measured, by the method described previously (Ref. 2).

### **Tartrate resistant acid phosphatase staining**

Tartrate resistant acid phosphatase staining was performed using Acid Phosphatase, Leukocyte (TRAP) Kit (Sigma-Aldrich 387A).

### **Drug inhibitory test**

Drug inhibitory test was performed ex vivo after 48 hours of drug administration, using the WST-8 kit (Cell Counting Kit-8, Dojindo).

### ***In vivo* treatment for plasma cell neoplasms**

$2 \times 10^5$  spleen cells from the secondary recipients of tumor-carrying *Mef<sup>-/-</sup> Rad50<sup>S/S</sup>* and age-matched wild type, control mice were transplanted into sub-lethally irradiated

recipient mice. Subsequently, melphalan (2.5mg/kg, day1-5) or bortezomib (0.5mg/kg, day 1-4) was administered to these mice. The survival of these mice was observed.

### **Exome Sequencing**

SureSelect Mouse All Exon Kit (Agilent Technologies) was used for enrichment of the entire mouse exome, and the 5500xl Genetic Analyzer (Applied Biosystems) was used for the sequencing. The data processing pipeline for detecting variants was as follows: First, the FASTQ files were processed to remove any adapter sequences at the end of the reads and trimmed to remove bases with a  $Q < 3$ . Reads shorter than 50bp were discarded and the files repaired to account for dropped reads. The clipped/trimmed reads were mapped and paired using the BWA mapper: `bwa aln` and `bwa sampe` or `samse` for unpaired reads. The mapped reads were processed with the Picard tools to sort by coordinate (`SortSam`) and have duplicated reads removed (`MarkDuplicates`). The BAM files were then processed using the GATK toolkit, following the published best practice guidelines. They were first realigned using the InDel realigner and then the base quality values were recalibrated using the BaseQRecalibrator. Variants were then called using the GATK Unified Genotyper. The calls were filtered to remove any mutations scored as `LowQual` by the Unified Genotyper or with an alternative allele

depth < 5 reads. The filtered calls were annotated with SNPEff and synonymous mutations were also filtered out from the list. To make the final list from this list, we selected genes with >0.15 of the variant frequency and variants which could not be observed in control samples, and excluded identical variants at an identical base as artifacts.

Ref 1. J Immunol. 191(11):5751-63, 2013. doi: 10.4049/jimmunol.1301300.

Ref. 2 Ann Hematol. 79:574-577, 2000

## Supplementary Figure and Table Legends

**Supplementary Figure S1: The results of D-J<sub>H</sub> rearrangement analysis, detected by PCR.**

Rearrangement of D to J<sub>1</sub>, J<sub>2</sub>, J<sub>3</sub>, or J<sub>4</sub> is indicated by arrowheads. Plasmacytoma samples from 2 different mice are shown as #1 and #2. The wild type spleen samples show 4 different D-J<sub>H</sub> rearrangement bands, while the different tumor samples derived from *Mef*<sup>-/-</sup> *Rad50*<sup>s/s</sup> mice show different monoclonal bands.

**Supplementary Figure S2: V(D)J Southern blotting of control and *Mef*<sup>-/-</sup> *Rad50*<sup>s/s</sup> tumor sample.**

DNA of the indicated tumor and control spleen was digested with EcoRI and analyzed for V(D)J rearrangements at the IgH locus by Southern blotting using a 3' J<sub>H</sub>4 probe. Wild-type splenic B cells were used as a positive control to detect IgH rearrangements (indicated by arrowheads).

**Supplementary Figure S3: Percentage of CD138<sup>+</sup> B220<sup>-</sup> plasma cells in bone marrow.**

Bone marrows were obtained from 6-month-old wild type control, *Mef<sup>f/-</sup>*, *Rad50<sup>s/s</sup>*, and *Mef<sup>f/-</sup> Rad50<sup>s/s</sup>* mice (n=4 each). Data are calculated from FACS data. P values are 0.0002 (wild type vs *Mef<sup>f/-</sup> Rad50<sup>s/s</sup>*), 0.0002 (*Mef<sup>f/-</sup>* vs *Mef<sup>f/-</sup> Rad50<sup>s/s</sup>*), and 0.0002 (*Rad50<sup>s/s</sup>* vs *Mef<sup>f/-</sup> Rad50<sup>s/s</sup>*), respectively.

**Supplementary Figure S4: Micro-vessel density measurement in bone marrow.**

Micro-vessel densities were measured on 8 *Mef<sup>f/-</sup> Rad50<sup>s/s</sup>*, 4 *Mef<sup>f/-</sup>* and 4 wild type bone marrow sections. All these mice were derived from the mice over 300 days old. P values are 0.010 (wild type vs *Mef<sup>f/-</sup> Rad50<sup>s/s</sup>*) and 0.018 (*Mef<sup>f/-</sup>* vs *Mef<sup>f/-</sup> Rad50<sup>s/s</sup>*), respectively.

**Supplementary Figure S5: The number of tartrate-positive osteoclasts per square millimeter in femur sections.**

Tartrate-resistant acid phosphatase and hematoxylin-eosin staining of the bones were performed to detect osteoclasts in the *Mef<sup>f/-</sup> Rad50<sup>s/s</sup>* mice (n=4) compared to wild type mice (n=4) and *Mef<sup>f/-</sup>* mice (n=4). The numbers of tartrate-positive osteoclasts in femurs

were counted under microscopy and the numbers per square millimeter were calculated.

The *Mef<sup>f/-</sup> Rad50<sup>s/s</sup>* mice showed significantly more osteoclasts in femurs than wild type and *Mef<sup>f/-</sup>* mice. P values are 0.0013 and 0.0009, respectively by t-test.

**Supplementary Figure S6: Amyloid deposits in *Mef<sup>f/-</sup> Rad50<sup>s/s</sup>* kidneys detected by Congo red staining.**

Microscopic pathological findings of the kidneys of 1-year-old *Mef<sup>f/-</sup> Rad50<sup>s/s</sup>* mice stained with Congo red, and viewed using a fluorescent microscope (x200).

**Supplementary Figure S7: *Ex vivo* and *in vivo* cytotoxicity test of anti-myeloma drugs to *Mef<sup>f/-</sup> Rad50<sup>s/s</sup>* plasma cell neoplasms.**

(a) Plasma cell tumor cell lines from *Mef<sup>f/-</sup> Rad50<sup>s/s</sup>* plasma cells and wild type plasma cells were analyzed for cytotoxicity to melphalan using the WST-8 kit (Cell Counting Kit-8). (b) *In vivo* treatment of *Mef<sup>f/-</sup> Rad50<sup>s/s</sup>* plasma cell neoplasms using a tertiary transplantation model.  $2 \times 10^5$  spleen cells from the secondary recipients of tumor-carrying *Mef<sup>f/-</sup> Rad50<sup>s/s</sup>* or age-matched wild type control mice were transplanted into sub-lethally irradiated recipient mice. Subsequently, melphalan (2.5mg/kg, day1-5) or bortezomib (0.5mg/kg, day 1-4), or vehicle control was administered to these mice.



The Kaplan-Meier curves show survival after the transplantation and drug administration. Both melphalan and bortezomib significantly prolonged the survival of the recipient mice that had received neoplastic *Mef*<sup>-/-</sup> *Rad50*<sup>s/s</sup> spleen cells. P values and sample numbers (n) are presented in the figures.

**Supplementary Figure S8: Analysis of transcript expression levels related to apoptosis.**

*Bcl2* and *Bax* transcript expression levels in *Mef*<sup>-/-</sup> *Rad50*<sup>s/s</sup> plasma cell tumors (n=8), wild type plasma cells (n=4), *Mef*<sup>-/-</sup> plasma cells (n=4), and *Rad50*<sup>s/s</sup> plasma cells (n=4), measured by qPCR.

**Supplementary Figure S9: Transcript expression level of some genes related to myelomagenesis.**

(a) *Ccnd1*, (b) *Ccnd3*, (c) *Prdm1*, (d) *Xbp1*, and (e) *Irf4* transcript expression levels in *Mef*<sup>-/-</sup> *Rad50*<sup>s/s</sup> plasma cell tumors (n=8), wild type plasma cells (n=4), *Mef*<sup>-/-</sup> plasma cells (n=4), *Rad50*<sup>s/s</sup> plasma cells (n=4), and wild type splenic B cells (n=4), measuring by qPCR.

**Supplementary Figure S10: Immunohistochemical analysis of Myc and CD138 in *Mef*<sup>-/-</sup> *Rad50*<sup>s/s</sup> tumors.**

Immunohistochemical analysis of WT and 8 different *Mef*<sup>-/-</sup> *Rad50*<sup>s/s</sup> spleen sections stained by CD138 and c-Myc. All slides were observed under the bright field microscope with x400 magnification.

**Supplementary Table S1: List of the *Mef*<sup>-/-</sup> *Rad50*<sup>s/s</sup> mice died over 200 days old.**

The mouse UID, sex, and survival day are listed with the results of pathological and FACS analyses which we performed on the day mice died. The table also demonstrates  $\kappa / \lambda$  deviation observed by FACS analysis and the existence of monoclonal peaks detected by serum protein electrophoresis.

**Supplementary Table S2: List of the somatically mutated genes and mutations, which were identified in the list of somatic mutations observed in human multiple myeloma patients by the whole genome sequencing.**

4 *Mef*<sup>-/-</sup> *Rad50*<sup>s/s</sup> tumor and 5 WT tail samples were used for this Exome sequencing.

**Supplementary Table S3: Functional Annotation Clustering by DAVID Software using the gene mutations which we found in *Mef*<sup>-/-</sup> *Rad50*<sup>s/s</sup> plasma cell neoplasms.**

4 *Mef*<sup>-/-</sup> *Rad50*<sup>s/s</sup> tumor and 5 WT tail samples were used for this Exome sequencing.

Only statistically significant (p<0.05) clustering are listed.

**Supplementary Table S4: Comparison of the biological and clinical features of multiple myeloma mouse models.**

## Supplementary Figure S1

The results of D-JH rearrangement analysis. detected by PCR.

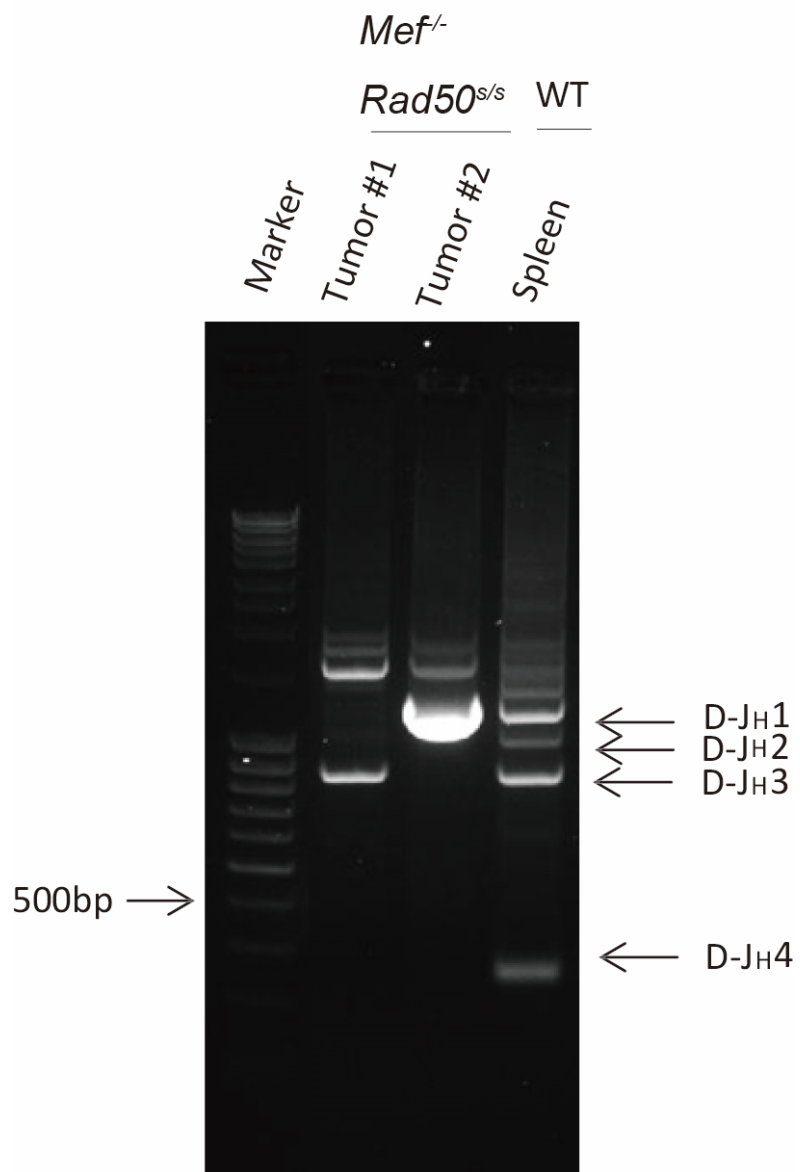

## Supplementary Figure S2

V(D)J Southern blotting of control and *Mef*<sup>-/-</sup> *Rad50*<sup>s/s</sup> tumor sample.

### Southern Blotting V(D)J rearrangement

WT *Mef*<sup>-/-</sup> *Rad50*<sup>s/s</sup>  
Spleen Tumor

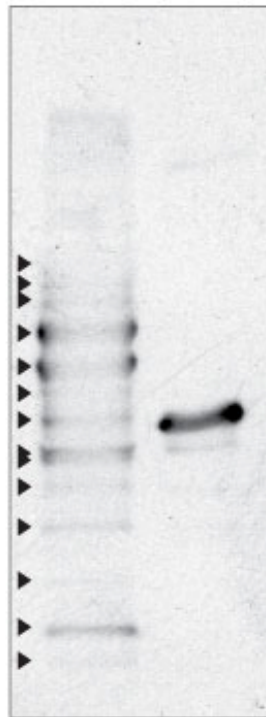

3' J<sub>H</sub>4 probe

# Supplementary Figure S3

Percentage of CD138<sup>+</sup> B220<sup>-</sup> plasma cells in bone marrow.

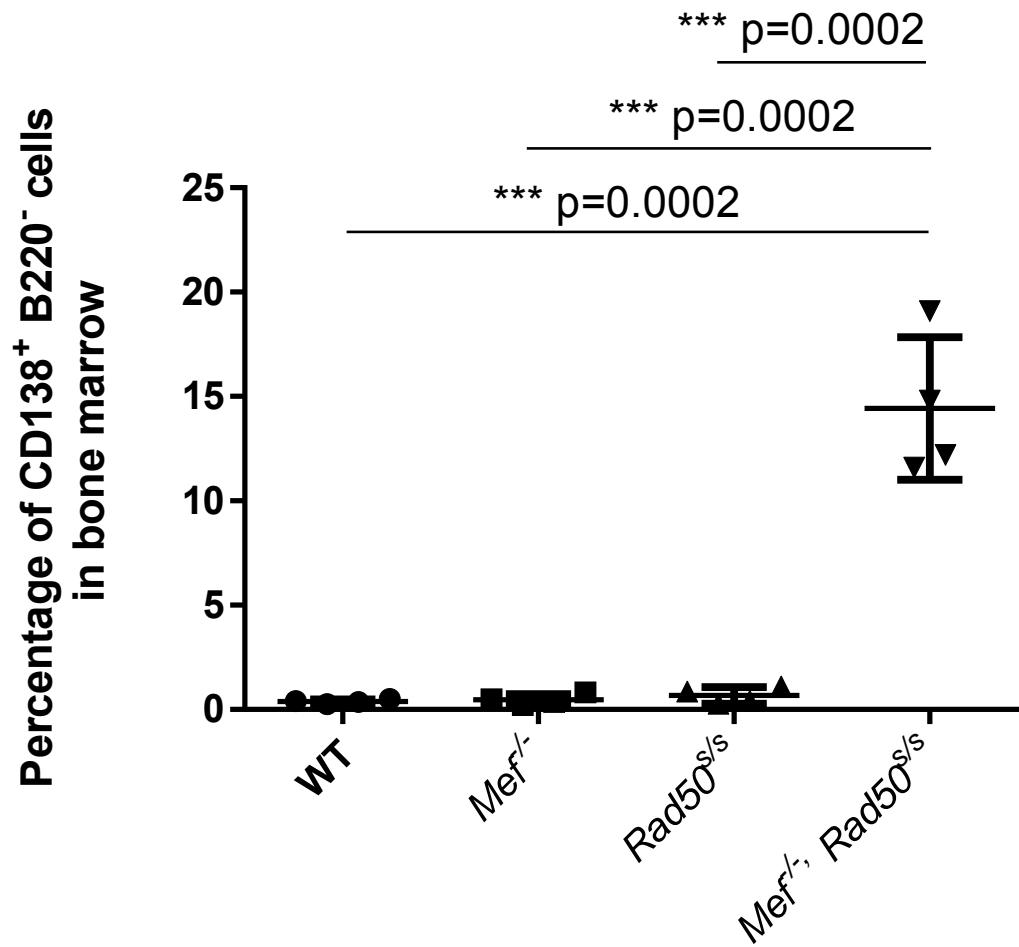

## Supplementary Figure S4

Micro-vessel density measurement in bone marrow sections.

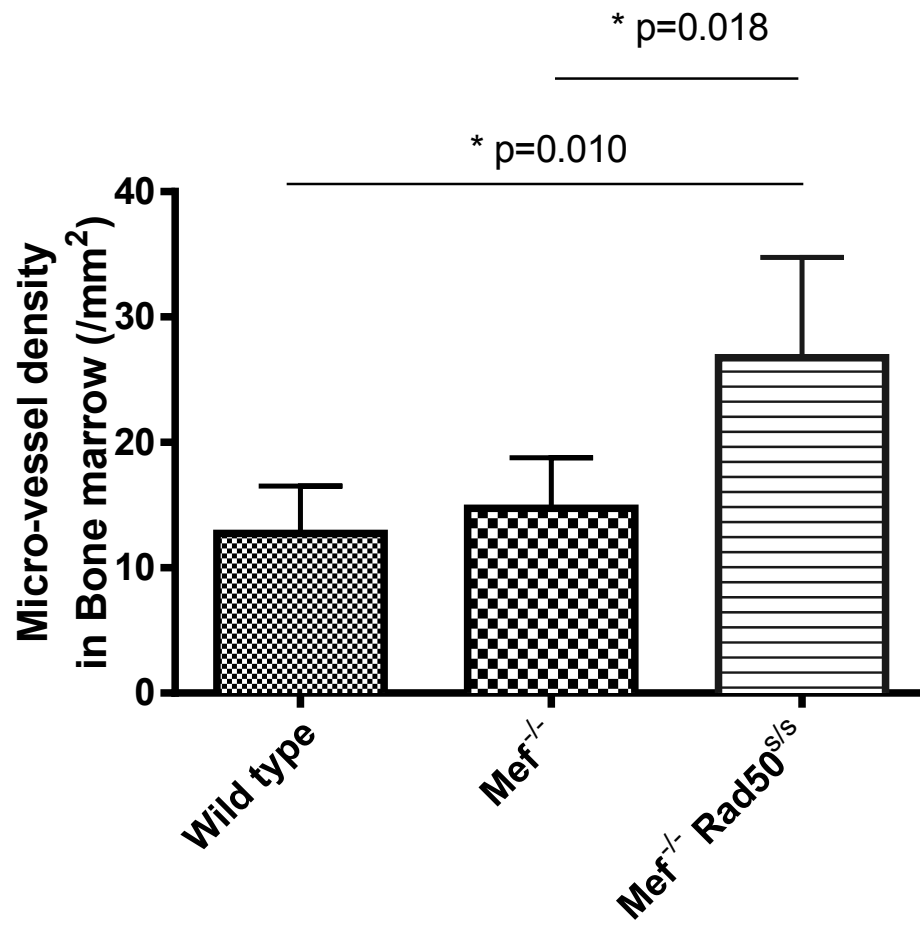

## Supplementary Figure S5

The number of tartrate-positive osteoclasts in femurs per square millimeter.

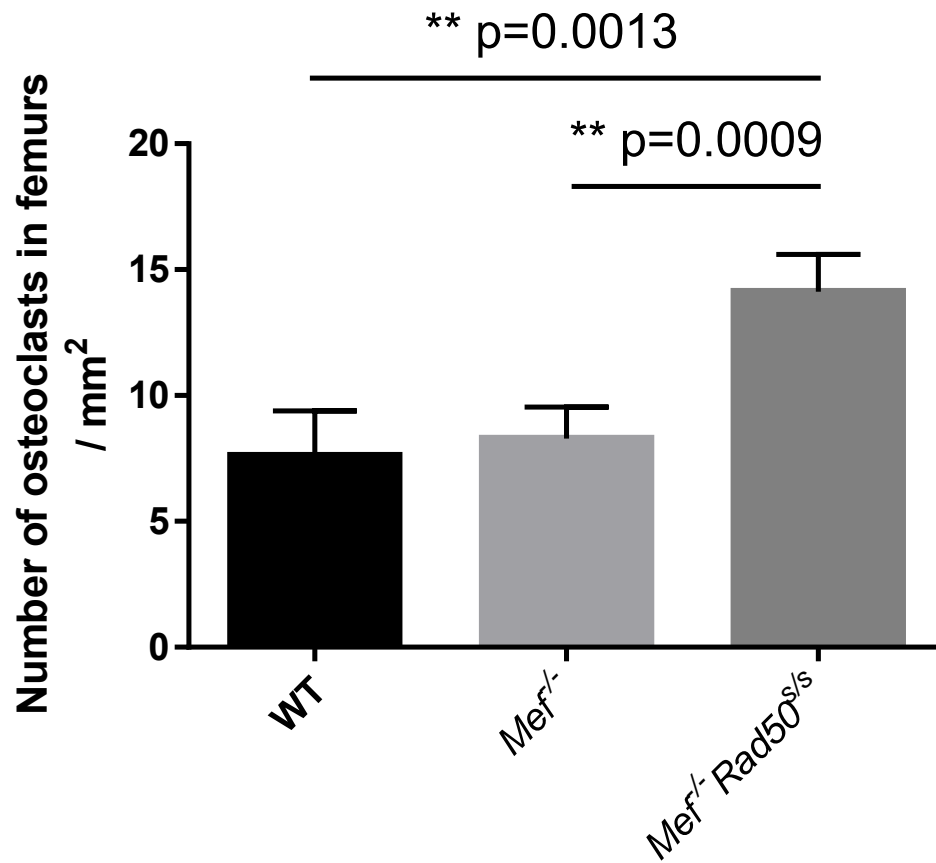



# Supplementary Figure S6

Amyloid deposits in *Mef*<sup>-/-</sup> *Rad50*<sup>s/s</sup> kidneys detected by Congo red staining.

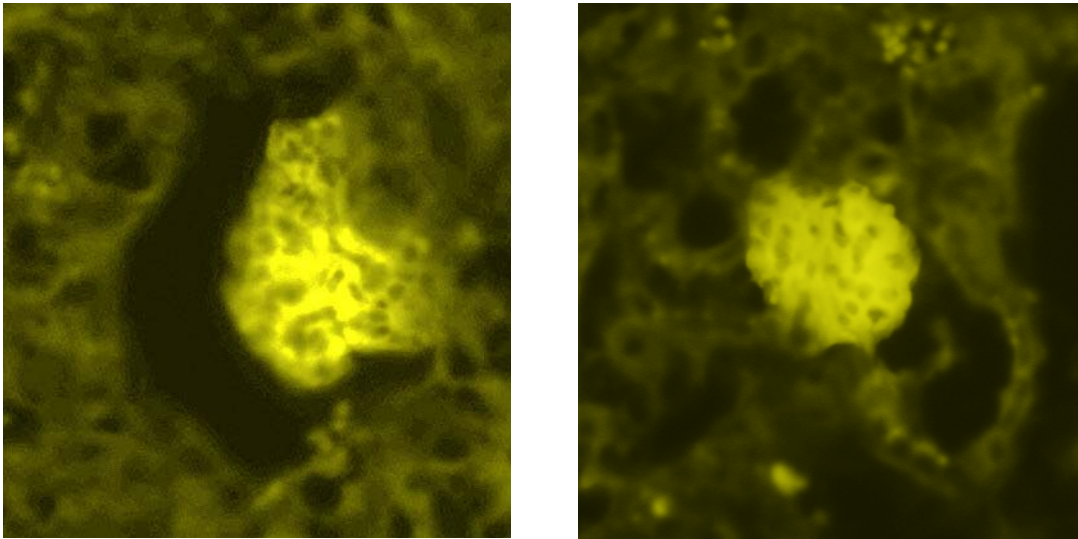

# Supplementary Figure S7

Ex vivo and in vivo cytotoxicity test of anti-myeloma drugs to *Mef*<sup>-/-</sup> *Rad50*<sup>S/S</sup> plasma cell neoplasms.

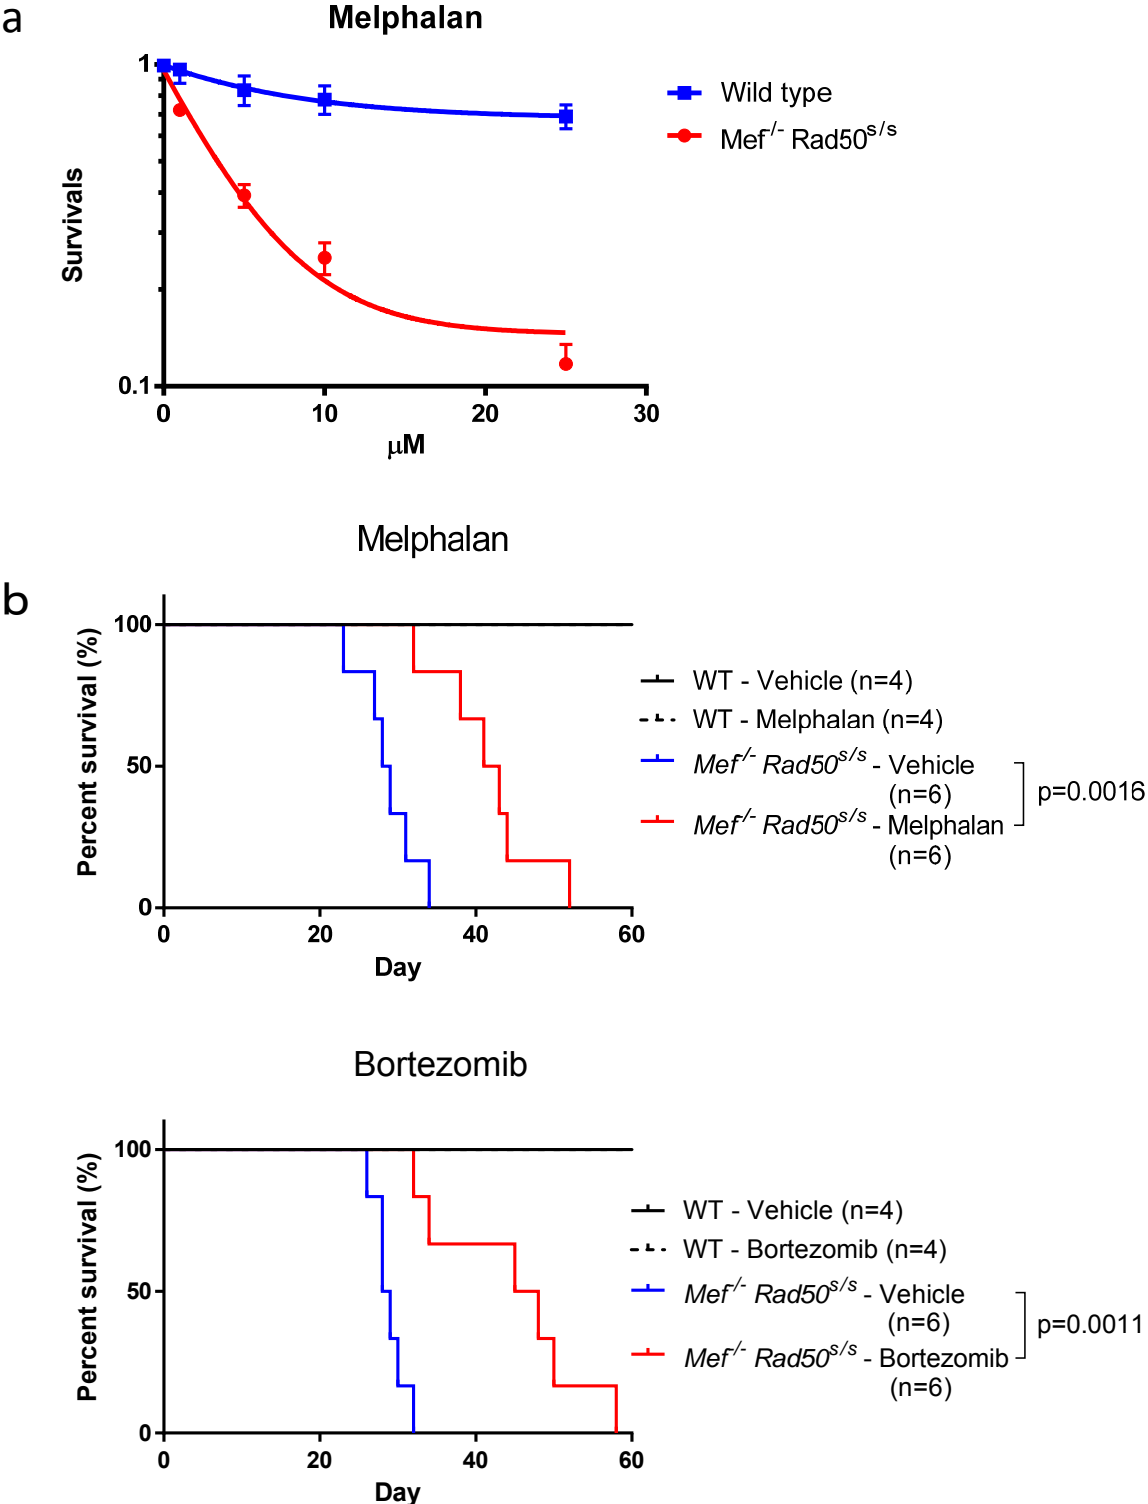

# Supplementary Figure S8

Analysis of transcript expression levels of Bcl2 and Bax.

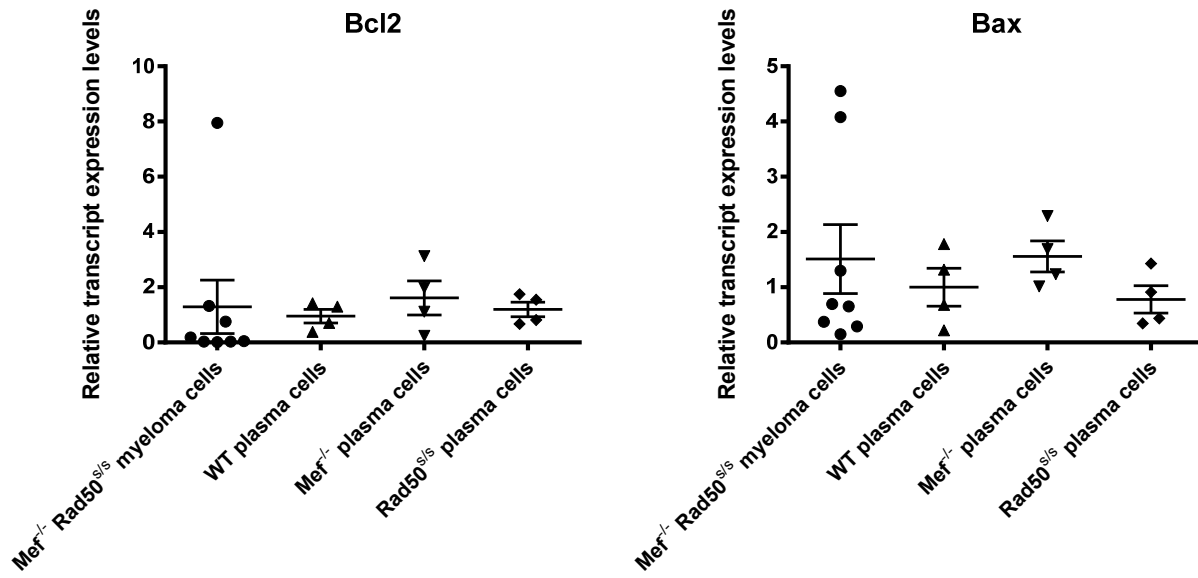

# Supplementary Figure S9

Transcript expression level of some genes related to myelomagenesis.

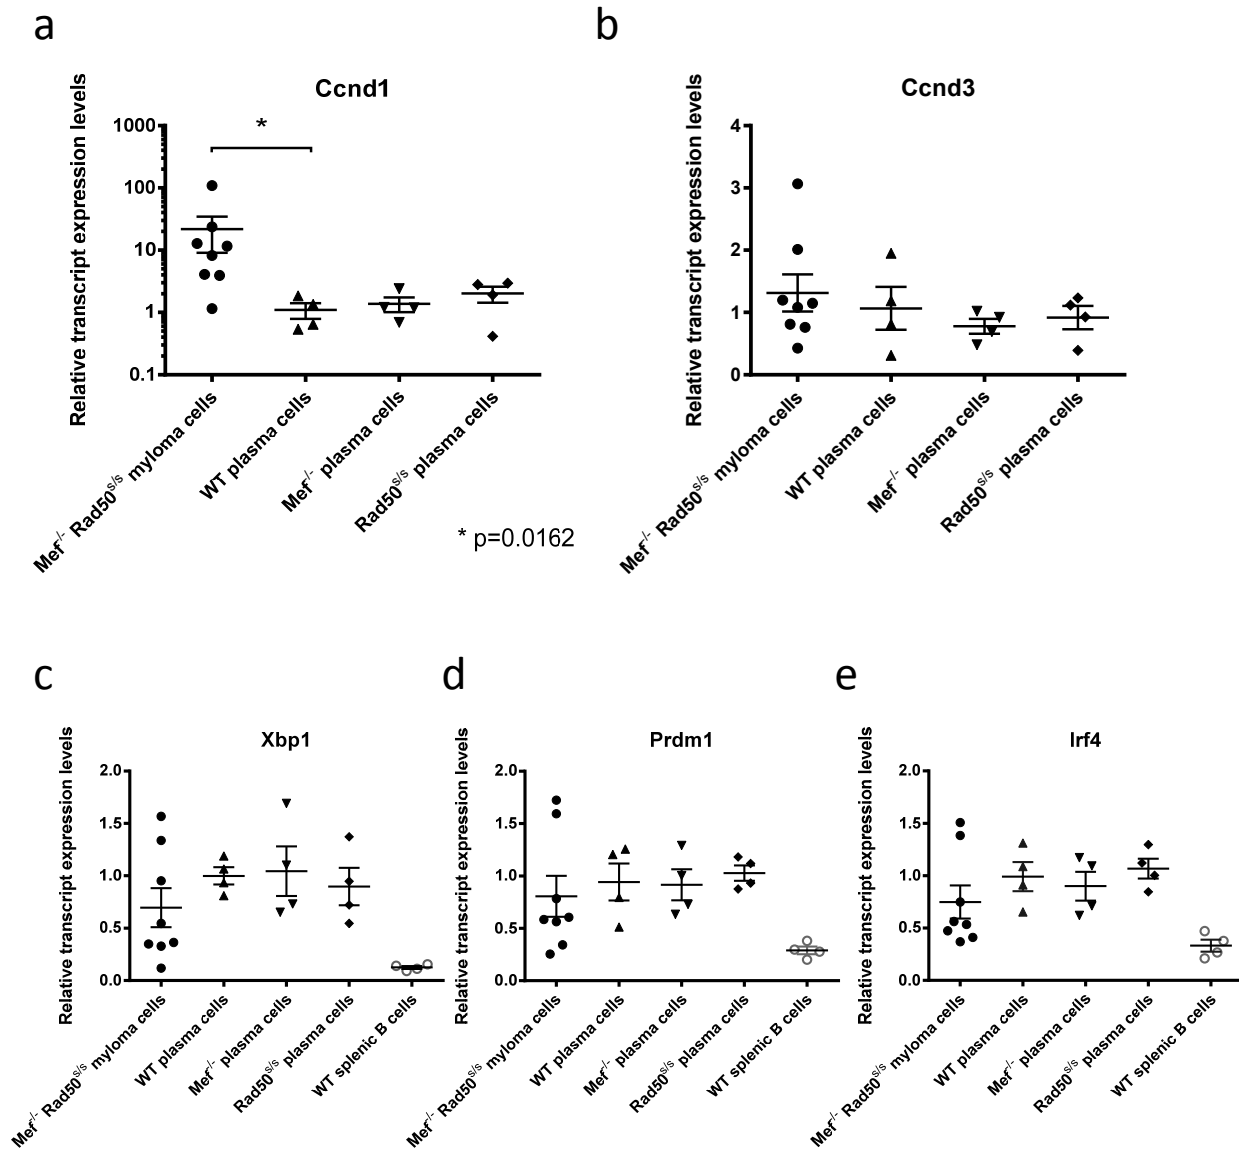

## Supplementary Figure S10

Immunohistochemical analysis of Myc and CD138 in *Mef<sup>-/-</sup> Rad50<sup>+/+</sup>* tumors.

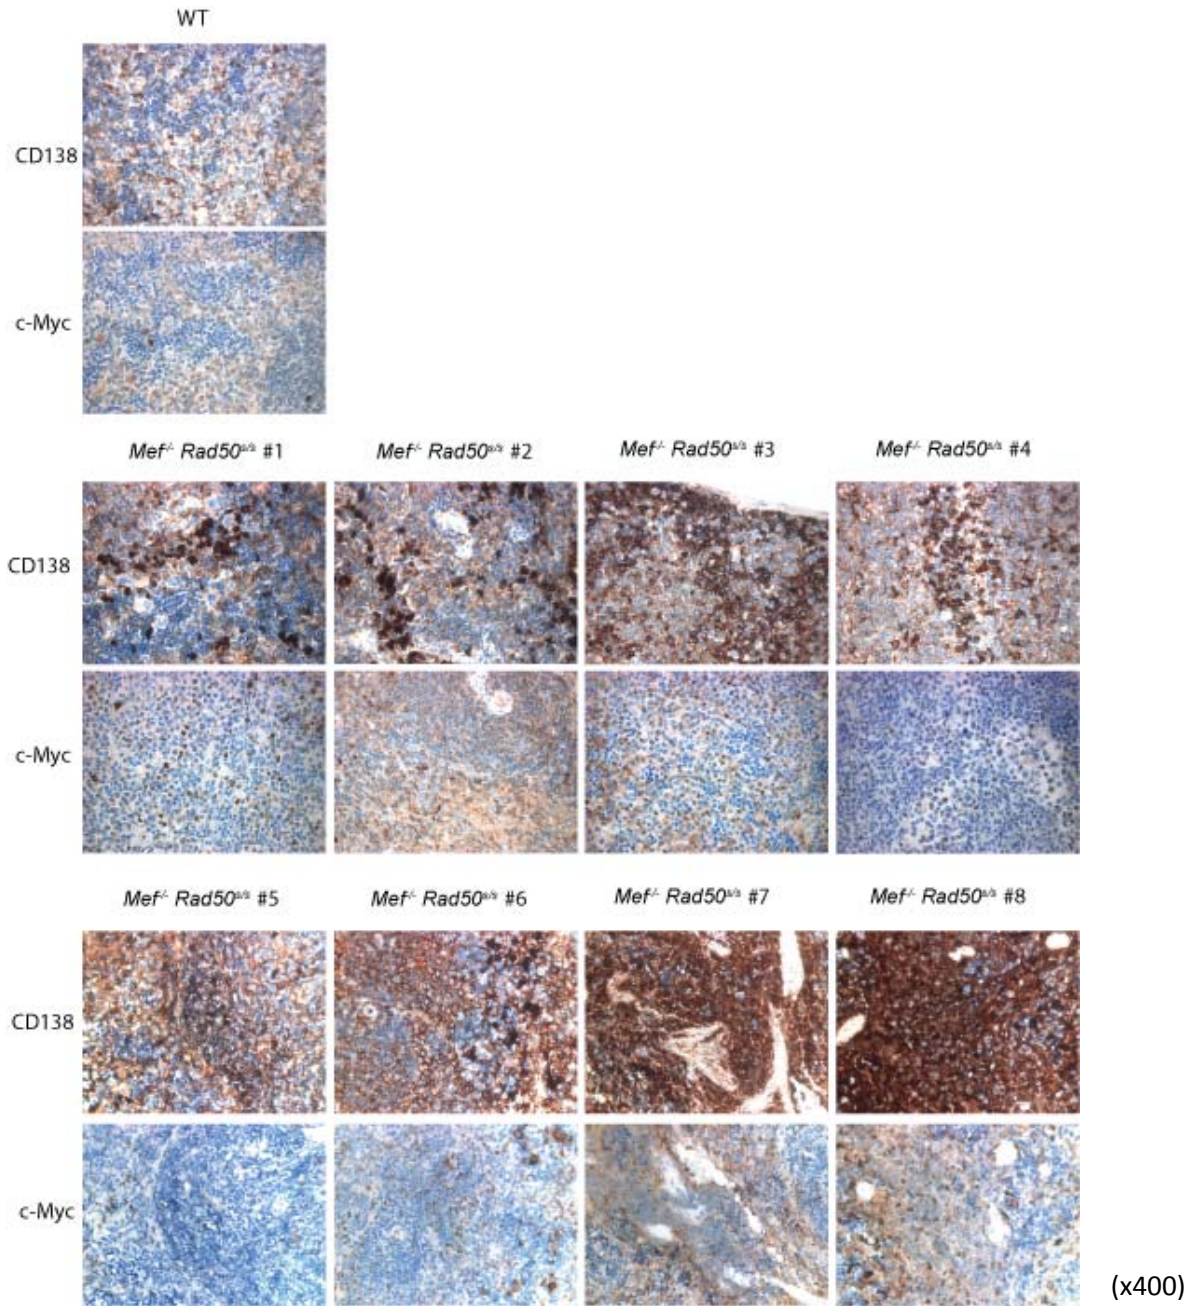

# Supplementary Table S1

List of the *Mef*<sup>-/-</sup> *Rad50*<sup>s/s</sup> mice died over 200 days old.

| Mice UID | Sex | Survival Days | Pathology                                                                                          | Ig class     | FACS analysis (κ/λ) | PEL: M peak |
|----------|-----|---------------|----------------------------------------------------------------------------------------------------|--------------|---------------------|-------------|
| 1830     | M   | 202           | Bone marrow aplasia                                                                                |              |                     |             |
| 783      | F   | 220           | Multiple myeloma and plasmacytic infiltration to lung                                              | IgG          | κ                   |             |
| 784      | F   | 220           | Plasmacytosis in medullar of LNs and bone marrow                                                   | IgG          | κ                   |             |
| 1304     | F   | 231           | Multiple myeloma in bone marrow BM and liver plasmacytosis                                         |              |                     |             |
| 2194     | F   | 234           | Unknown                                                                                            |              |                     |             |
| 1752     | M   | 264           | Unknown                                                                                            |              |                     |             |
| 2154     | F   | 275           | Multiple myeloma                                                                                   | not detected |                     |             |
| 226      | F   | 278           | Unknown                                                                                            | N/A          |                     |             |
| 408      | F   | 293           | Multiple Myeloma with excess (>60%) of plasma cells in bone marrow                                 | IgG          | λ                   |             |
| 897      | M   | 305           | Multiple Myeloma                                                                                   | IgG          | κ                   |             |
| 683      | M   | 311           | Plasma cell proliferation in bone marrow and spleen                                                | not detected | κ                   | -           |
| 395      | F   | 338           | Multiple myeloma                                                                                   | IgG          | κ                   |             |
| 776      | M   | 345           | Plasma cell hyperplasia in bone marrow                                                             | IgG          | κ                   |             |
| 779      | M   | 345           | Plasmacytic leukemia                                                                               | IgG          | λ                   |             |
| 386      | F   | 351           | Multiple Myeloma with excess (>80%) of plasma cells in bone marrow                                 | IgG          | κ                   |             |
| 487      | F   | 366           | Unknown                                                                                            |              |                     |             |
| 1341     | F   | 379           | Extramedullary plasmacytome                                                                        |              |                     | -           |
| 381      | F   | 380           | Plasma cell leukemia                                                                               | IgG          | κ                   | +           |
| 399      | F   | 389           | Extramedullary Plasmacytome, Lymphoplasmacytic inflammation in bone marrow with Lymphoid depletion | IgG          | κ                   |             |
| 561      | M   | 416           | Plasma cell hyperplasia in bone marrow                                                             |              | κ                   | -           |
| 609      | M   | 428           | Mediastinal plasmacytoma                                                                           |              |                     | +           |
| 116      | M   | 456           | Plasma cell proliferation in bone marrow                                                           | IgA          | κ                   | +           |
| 833      | F   | 478           | Plasmacytic Leukimia                                                                               | IgG          | κ                   | +           |
| 328      | F   | 494           | Multiple myeloma                                                                                   |              |                     |             |
| 1686     | F   | 503           | Multiple myeloma                                                                                   | IgG          | λ                   | +           |
| 60       | M   | 506           | Multiple myeloma with plasmacytome                                                                 | IgG          | λ                   |             |
| 319      | F   | 521           | Multiple myeloma                                                                                   |              |                     | +           |
| 112      | F   | 566           | Extramedullary plasmacytome                                                                        | IgG          | κ                   |             |
| 707      | F   | 584           | Multiple myeloma                                                                                   |              |                     | +           |
| 396      | F   | 607           | Multiple Myeloma with pleural effusion                                                             | IgG          | κ                   | +           |

# Supplementary Table S2

List of the somatically mutated genes and mutations, which were identified in the list of somatic mutation observed in human multiple myeloma patients by the whole genome sequencing.

| GENE NAME | SAMPLE | CHROMOSOME | REFERENCE | ALTERATION | MUTATION EFFECT       | ENSMBL TRANSCRIPT ID | AMINO ACID CHANGE | MUTATION FREQUENCY |
|-----------|--------|------------|-----------|------------|-----------------------|----------------------|-------------------|--------------------|
| Adam17    | #3     | chr12      | A         | C          | NON_SYNONYMOUS_CODING | ENSMUST00000064536   | L496R             | 0.5                |
| Aff1      | #3     | chr5       | C         | A          | NON_SYNONYMOUS_CODING | ENSMUST00000054979   | P1218T            | 1                  |
| Agbl4     | #3     | chr4       | C         | T          | STOP_GAINED           | ENSMUST00000097920   | E491*             | 0.375              |
| Agbl4     | #3     | chr4       | G         | A          | NON_SYNONYMOUS_CODING | ENSMUST00000097920   | L493I             | 0.3333             |
| Agbl4     | #3     | chr4       | A         | T          | NON_SYNONYMOUS_CODING | ENSMUST00000097920   | I497F             | 0.3704             |
| Agbl4     | #3     | chr4       | A         | T          | NON_SYNONYMOUS_CODING | ENSMUST00000097920   | Q498H             | 0.4194             |
| Agbl4     | #3     | chr4       | C         | A          | STOP_GAINED           | ENSMUST00000097920   | W523*             | 0.4167             |
| Agbl4     | #3     | chr4       | A         | T          | NON_SYNONYMOUS_CODING | ENSMUST00000097920   | N524Y             | 0.4225             |
| Agbl4     | #3     | chr4       | G         | A          | NON_SYNONYMOUS_CODING | ENSMUST00000097920   | L533H             | 0.4167             |
| Agbl4     | #3     | chr4       | T         | C          | STOP_LOST             | ENSMUST00000097920   | *541C             | 0.4286             |
| Aloxe3    | #1     | chr11      | A         | C          | NON_SYNONYMOUS_CODING | ENSMUST00000021268   | T312P             | 0.4286             |
| Arhgef10  | #4     | chr8       | G         | C          | NON_SYNONYMOUS_CODING | ENSMUST00000110800   | G309R             | 0.3158             |
| Arhgef10  | #4     | chr8       | T         | G          | NON_SYNONYMOUS_CODING | ENSMUST00000110800   | S1201A            | 0.25               |
| Arhgef10  | #4     | chr8       | G         | A          | NON_SYNONYMOUS_CODING | ENSMUST00000110800   | V1202I            | 0.2759             |
| Arhgef10  | #4     | chr8       | A         | G          | NON_SYNONYMOUS_CODING | ENSMUST00000110800   | T1212A            | 0.3478             |
| Arhgef10  | #4     | chr8       | A         | C          | NON_SYNONYMOUS_CODING | ENSMUST00000110800   | N1225T            | 0.4211             |
| Arhgef10  | #4     | chr8       | G         | A          | NON_SYNONYMOUS_CODING | ENSMUST00000110800   | R1247K            | 0.3913             |
| Atp1a4    | #1     | chr1       | G         | A          | NON_SYNONYMOUS_CODING | ENSMUST00000111243   | E8V               | 1                  |
| Cacna1c   | #3     | chr6       | A         | G          | NON_SYNONYMOUS_CODING | ENSMUST00000112825   | L1664S            | 1                  |
| Camta1    | #1     | chr4       | A         | G          | NON_SYNONYMOUS_CODING | ENSMUST00000049790   | L336P             | 1                  |
| Ccdc123   | #3     | chr7       | C         | G          | NON_SYNONYMOUS_CODING | ENSMUST00000079414   | A58G              | 1                  |
| Cfr       | #2     | chr6       | C         | G          | NON_SYNONYMOUS_CODING | ENSMUST00000045706   | S13A              | 0.5833             |
| Chd3      | #4     | chr11      | T         | A          | STOP_GAINED           | ENSMUST00000092971   | Q1004*            | 0.8333             |
| Cpsf3     | #3     | chr12      | T         | C          | NON_SYNONYMOUS_CODING | ENSMUST00000067284   | T402P             | 0.3958             |
| Csmd1     | #4     | chr8       | C         | T          | NON_SYNONYMOUS_CODING | ENSMUST00000082104   | R3394Q            | 0.6                |
| Csmd1     | #4     | chr8       | C         | T          | NON_SYNONYMOUS_CODING | ENSMUST00000082104   | S2844N            | 0.4048             |
| Csmd1     | #4     | chr8       | G         | T          | NON_SYNONYMOUS_CODING | ENSMUST00000082104   | T2829K            | 0.4706             |
| Csmd1     | #4     | chr8       | G         | T          | NON_SYNONYMOUS_CODING | ENSMUST00000082104   | T1148N            | 0.4667             |
| Csmd1     | #4     | chr8       | T         | C          | NON_SYNONYMOUS_CODING | ENSMUST00000082104   | I345V             | 0.3793             |
| Cux2      | #3     | chr5       | T         | C          | NON_SYNONYMOUS_CODING | ENSMUST00000086317   | L521R             | 0.9                |
| Dock10    | #1     | chr1       | A         | G          | NON_SYNONYMOUS_CODING | ENSMUST00000077946   | E1697A            | 1                  |
| Dock10    | #1     | chr1       | G         | T          | NON_SYNONYMOUS_CODING | ENSMUST00000077946   | I222N             | 1                  |
| Donson    | #4     | chr16      | G         | A          | NON_SYNONYMOUS_CODING | ENSMUST00000023682   | Q211H             | 0.7333             |
| Dsp       | #1     | chr5       | A         | G          | NON_SYNONYMOUS_CODING | ENSMUST00000112771   | D855G             | 0.8333             |
| Gabrb2    | #2     | chr11      | T         | G          | NON_SYNONYMOUS_CODING | ENSMUST0000007797    | D450E             | 1                  |
| Gas7      | #1     | chr11      | A         | G          | NON_SYNONYMOUS_CODING | ENSMUST00000041611   | S51A              | 1                  |
| Gpatch2   | #1     | chr1       | C         | G          | NON_SYNONYMOUS_CODING | ENSMUST00000160471   | S241G             | 0.5714             |
| Ifi122    | #2     | chr6       | C         | G          | NON_SYNONYMOUS_CODING | ENSMUST00000038234   | Y235D             | 1                  |
| Ifi122    | #2     | chr6       | A         | G          | NON_SYNONYMOUS_CODING | ENSMUST00000038234   | M551V             | 1                  |
| Ifi122    | #2     | chr6       | C         | T          | NON_SYNONYMOUS_CODING | ENSMUST00000038234   | L691F             | 1                  |
| Kcnc1     | #3     | chr7       | A         | G          | NON_SYNONYMOUS_CODING | ENSMUST00000160433   | E541G             | 1                  |
| Kif1a     | #4     | chr1       | T         | C          | NON_SYNONYMOUS_CODING | ENSMUST00000086819   | N90K              | 0.7143             |
| Ksr2      | #3     | chr5       | G         | C          | NON_SYNONYMOUS_CODING | ENSMUST00000180430   | K283T             | 1                  |
| Lrp8      | #3     | chr4       | G         | A          | NON_SYNONYMOUS_CODING | ENSMUST00000126573   | C586Y             | 0.5                |
| Lrp8      | #3     | chr4       | T         | C          | NON_SYNONYMOUS_CODING | ENSMUST00000126573   | N653T             | 0.7                |
| Mcf2l     | #4     | chr8       | A         | G          | NON_SYNONYMOUS_CODING | ENSMUST00000145067   | T8A               | 0.4865             |
| Mcf2l     | #4     | chr8       | A         | G          | NON_SYNONYMOUS_CODING | ENSMUST00000145067   | S9G               | 0.4789             |
| Mcf2l     | #4     | chr8       | G         | T          | STOP_LOST             | ENSMUST00000110867   | *1102L            | 0.4286             |
| Mphosph9  | #3     | chr5       | A         | G          | NON_SYNONYMOUS_CODING | ENSMUST00000031344   | S934R             | 1                  |
| Mphosph9  | #4     | chr5       | A         | G          | NON_SYNONYMOUS_CODING | ENSMUST00000031344   | S934R             | 0.9444             |
| Mphosph9  | #3     | chr5       | TA        | T          | FRAME_SHIFT           | ENSMUST00000031344   | -163              | 0.5455             |
| Mpl       | #3     | chr4       | C         | T          | NON_SYNONYMOUS_CODING | ENSMUST00000106375   | S243N             | 0.5254             |
| Mpl       | #3     | chr4       | G         | A          | STOP_GAINED           | ENSMUST00000106375   | Q238*             | 0.4571             |
| Myo9a     | #1     | chr9       | A         | AG         | FRAME_SHIFT           | ENSMUST00000123128   | -681?             | 1                  |

# Supplementary Table S2(Cont.)

|          |    |       |       |    |                       |                     |        |        |
|----------|----|-------|-------|----|-----------------------|---------------------|--------|--------|
| Myom2    | #4 | chr8  | G     | A  | NON_SYNONYMOUS_CODING | ENSMUST00000033842  | R123Q  | 0.4107 |
| Myom2    | #4 | chr8  | A     | C  | NON_SYNONYMOUS_CODING | ENSMUST00000033842  | M131L  | 0.3433 |
| Myom2    | #4 | chr8  | T     | C  | NON_SYNONYMOUS_CODING | ENSMUST00000033842  | S234P  | 0.4545 |
| Myom2    | #4 | chr8  | C     | A  | NON_SYNONYMOUS_CODING | ENSMUST00000033842  | L977I  | 0.3676 |
| Myom2    | #4 | chr8  | G     | A  | NON_SYNONYMOUS_CODING | ENSMUST00000033842  | V1182I | 0.4783 |
| Myom2    | #4 | chr8  | G     | A  | NON_SYNONYMOUS_CODING | ENSMUST00000033842  | S1311N | 0.4048 |
| Nefm     | #1 | chr14 | G     | A  | NON_SYNONYMOUS_CODING | ENSMUST00000022638  | T408I  | 0.7143 |
| Nfia     | #1 | chr4  | A     | AT | FRAME_SHIFT           | ENSMUST00000052018  | -16?   | 1      |
| Numa1    | #3 | chr7  | A     | C  | NON_SYNONYMOUS_CODING | ENSMUST00000084852  | I848L  | 1      |
| Obscn    | #1 | chr11 | A     | G  | NON_SYNONYMOUS_CODING | ENSMUST00000047441  | D7634A | 1      |
| Obscn    | #1 | chr11 | C     | T  | NON_SYNONYMOUS_CODING | ENSMUST00000047441  | Y7632N | 1      |
| Obscn    | #4 | chr11 | T     | C  | NON_SYNONYMOUS_CODING | ENSMUST00000047441  | I7317V | 1      |
| Obscn    | #3 | chr11 | A     | G  | NON_SYNONYMOUS_CODING | ENSMUST00000047441  | V7293L | 1      |
| Obscn    | #1 | chr11 | A     | C  | NON_SYNONYMOUS_CODING | ENSMUST00000047441  | V7208G | 1      |
| Obscn    | #4 | chr11 | AC    | A  | FRAME_SHIFT           | ENSMUST00000047441  | -8833  | 1      |
| Obscn    | #4 | chr11 | A     | G  | NON_SYNONYMOUS_CODING | ENSMUST00000047441  | S6597T | 1      |
| Obscn    | #3 | chr11 | C     | T  | NON_SYNONYMOUS_CODING | ENSMUST00000047441  | E6476K | 1      |
| Obscn    | #4 | chr11 | G     | T  | NON_SYNONYMOUS_CODING | ENSMUST00000081658  | A1127T | 1      |
| Obscn    | #1 | chr11 | C     | T  | NON_SYNONYMOUS_CODING | ENSMUST00000047441  | S3626N | 1      |
| Pfas     | #4 | chr11 | C     | T  | NON_SYNONYMOUS_CODING | ENSMUST00000021282  | F220L  | 1      |
| Pkhd1    | #1 | chr1  | G     | A  | NON_SYNONYMOUS_CODING | ENSMUST00000088484  | L1872F | 0.8333 |
| Pkhd11   | #2 | chr15 | AGT   | A  | FRAME_SHIFT           | ENSMUST00000038336  | -837   | 0.3158 |
| Prkcz    | #1 | chr4  | A     | G  | NON_SYNONYMOUS_CODING | ENSMUST000000103178 | G230A  | 0.8889 |
| Prkd2    | #4 | chr7  | G     | A  | NON_SYNONYMOUS_CODING | ENSMUST00000086104  | V121E  | 1      |
| Ptk2     | #2 | chr15 | G     | A  | STOP_GAINED           | ENSMUST000000110036 | K381*  | 1      |
| Ptk2     | #2 | chr15 | T     | C  | SPLICE_SITE_ACCEPTOR  | ENSMUST000000110036 | .      | 1      |
| RALYL    | #3 | chr3  | A     | G  | NON_SYNONYMOUS_CODING | ENSMUST000000108373 | I10V   | 0.3429 |
| Rasgrf1  | #3 | chr9  | CA    | C  | FRAME_SHIFT           | ENSMUST00000034912  | -944   | 0.5556 |
| Ripk4    | #4 | chr16 | T     | G  | NON_SYNONYMOUS_CODING | ENSMUST000000113743 | L528P  | 1      |
| Ripk4    | #4 | chr16 | A     | G  | NON_SYNONYMOUS_CODING | ENSMUST000000113743 | W518C  | 1      |
| Ripk4    | #4 | chr16 | G     | A  | NON_SYNONYMOUS_CODING | ENSMUST000000113743 | A517V  | 1      |
| Serpine2 | #1 | chr1  | G     | A  | NON_SYNONYMOUS_CODING | ENSMUST00000027467  | M219I  | 1      |
| Serpine2 | #1 | chr1  | T     | C  | NON_SYNONYMOUS_CODING | ENSMUST00000027467  | Q216E  | 1      |
| Slc1a5   | #4 | chr7  | C     | T  | NON_SYNONYMOUS_CODING | ENSMUST000000108496 | S217L  | 0.9    |
| Slc1a5   | #4 | chr7  | T     | C  | NON_SYNONYMOUS_CODING | ENSMUST000000108496 | L469S  | 0.8333 |
| Slc1a5   | #4 | chr7  | A     | G  | NON_SYNONYMOUS_CODING | ENSMUST000000108496 | L471V  | 0.8333 |
| Spta1    | #1 | chr1  | C     | T  | NON_SYNONYMOUS_CODING | ENSMUST00000027817  | C222F  | 0.8333 |
| Spta1    | #1 | chr1  | A     | G  | NON_SYNONYMOUS_CODING | ENSMUST00000027817  | S1127R | 0.7    |
| Spta1    | #3 | chr1  | C     | T  | NON_SYNONYMOUS_CODING | ENSMUST00000027817  | K1439I | 0.5385 |
| Spta1    | #1 | chr1  | A     | G  | NON_SYNONYMOUS_CODING | ENSMUST00000027817  | V2406G | 0.5556 |
| Srm2     | #2 | chr17 | C     | A  | NON_SYNONYMOUS_CODING | ENSMUST00000088621  | A542D  | 1      |
| Syt12    | #1 | chr7  | C     | T  | NON_SYNONYMOUS_CODING | ENSMUST000000107210 | P168L  | 1      |
| Tada2a   | #3 | chr11 | A     | G  | NON_SYNONYMOUS_CODING | ENSMUST00000018795  | N120H  | 1      |
| Tecpr1   | #1 | chr5  | C     | T  | NON_SYNONYMOUS_CODING | ENSMUST00000085701  | L714I  | 1      |
| Tmcc1    | #2 | chr6  | TAGGA | T  | FRAME_SHIFT           | ENSMUST00000088896  | -101   | 1      |
| Vps13d   | #1 | chr4  | G     | A  | NON_SYNONYMOUS_CODING | ENSMUST00000020441  | E1551D | 0.625  |
| Vps13d   | #1 | chr4  | G     | T  | NON_SYNONYMOUS_CODING | ENSMUST00000020441  | I1400K | 1      |
| Vps13d   | #1 | chr4  | C     | T  | STOP_GAINED           | ENSMUST00000020441  | L1393* | 0.8333 |
| Zan      | #3 | chr5  | T     | A  | STOP_GAINED           | ENSMUST000000117564 | K4109* | 1      |
| Zan      | #3 | chr5  | T     | G  | NON_SYNONYMOUS_CODING | ENSMUST000000117564 | D2883H | 1      |
| Zkscan3  | #1 | chr13 | C     | A  | STOP_GAINED           | ENSMUST00000070785  | Q426*  | 0.4043 |



## Supplementary Table S3

Functional Annotation Clustering by David Software using the gene mutations which we found in *Mef<sup>-/-</sup> Rad50<sup>s/s</sup>* plasma cell neoplasms.

| Clustering      | P Value | Gene No. | Gene Names                                                            |
|-----------------|---------|----------|-----------------------------------------------------------------------|
| ABC transporter | 0.023   | 5        | Abca5, Abca9, Abcc3, Abcd1, Cfr                                       |
| NF-KB signaling | 0.026   | 6        | Relb, Nfat5, Nfkb1, Camta1, Pkhd1, Pkhd1l1                            |
| Notch signaling | 0.032   | 5        | Notch2, Adam17, Dll3, Ncstn, Psen2                                    |
| Focal adhesion  | 0.005   | 10       | Ptk2, Rasgrf1, Rock1, Rock2, Chad, Col4a1, Col5a3, Lama3, Myl2, Prkca |

## Supplementary Table S4

Comparison of the biological and clinical features of multiple myeloma mouse models.

|                                 | E $\mu$ XBP1       |           | V $\kappa$ *MYC |           | <i>Mef</i> <sup>-/-</sup> <i>Rad50</i> <sup>s/s</sup> |           | Human Multiple Mueloma |
|---------------------------------|--------------------|-----------|-----------------|-----------|-------------------------------------------------------|-----------|------------------------|
| Median survival                 | more than 700 days |           | 661 days        |           | 478 days                                              |           |                        |
| Diagnosis of plasma cell tumors | 26% @ 44-80w       |           | 70% @ 80w       |           | 70% @ 44w                                             |           |                        |
| Location                        | BM, EM             |           | BM, EM          |           | BM, EM                                                |           | BM                     |
| Slowly progressive              | +                  |           | +               |           | +                                                     |           | +                      |
| SHM (median)                    | No                 |           | 2.6%            |           | 3.2%                                                  |           | 6-8 %                  |
| Most common Ig subtype          | IgM > IgG          |           | IgG             |           | IgG                                                   |           | IgG                    |
| Age-related M-spike             | Yes                | 30% @ 50w | Yes             | 80% @ 50w | Yes                                                   | 73% @ 44w | Yes                    |
| Transplantability               | n.d                |           | +               |           | +                                                     |           | + to SCID mice         |
| Anemia                          | n.d                |           | Yes             |           | Yes                                                   |           | Yes                    |
| Osteoporosis                    | n.d                |           | Yes             |           | Yes                                                   |           | Yes                    |
| Kidney disease                  | Yes                |           | Yes             |           | Yes                                                   |           | Yes                    |
| Myc overexpression              | n.d                |           | 100%            |           | 63%                                                   |           | 67%                    |
